# Supplementary material for: Identification of Three Autophagy-Related Long Non-Coding RNAs as a Novel Head and Neck Squamous Cell Carcinoma Prognostic Signature
Source: PubMed Central journal article supplement (PMC7871905; doi:10.3389/fonc.2020.603864), 2021-01-26

### Supplementary material 1

Analysis of flowchart illustrates the exploration procedure for the HNSCC prognosis related autophagy lncRNAs

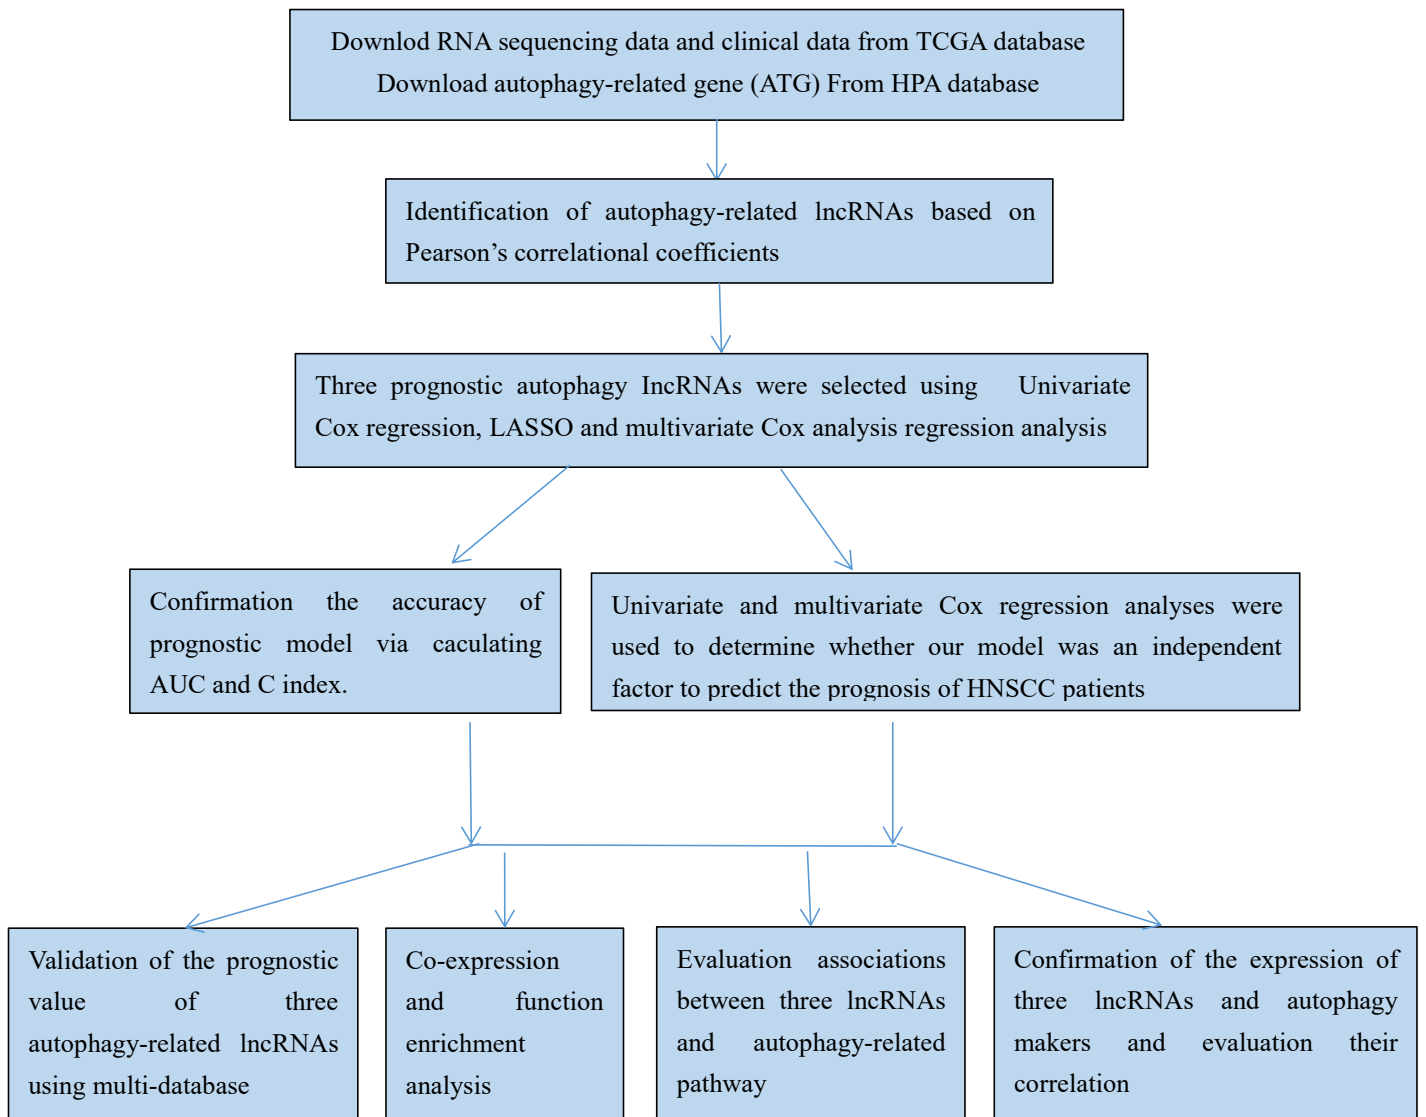

Supplement: DataSheet_1.pdf [file DataSheet_1.pdf]
